# Supplementary material for: Adaptation Dynamics in Densely Clustered Chemoreceptors
Source: PubMed Central journal article supplement (PMC3777915; doi:10.1371/journal.pcbi.1003230), 2013-09-19
Supplement: pcbi.1003230.s008.pdf [file pcbi.1003230.s008.pdf]

|                                                           |              |                       |
|-----------------------------------------------------------|--------------|-----------------------|
| Total number of receptor monomers (base)                  | $T_{Tot,0}$  | 14400                 |
| Total number of CheR (base)                               | $R_{Tot,0}$  | 140                   |
| Total number of CheB (base)                               | $B_{Tot,0}$  | 240                   |
| Number of receptor dimers per MWC cluster                 | $N$          | 6                     |
| Basal free energy difference, active and inactive cluster | $\epsilon_0$ | 6 (units of $k_B T$ ) |
| Free energy change per added methyl group                 | $\epsilon_l$ | 1 (units of $k_B T$ ) |
| MeAsp dissociation constant, inactive Tar receptor        | $K$          | 0.0182 mM             |
| MeAsp dissociation constant, active Tar receptor          | $K^*$        | 3 mM                  |
