# Supplementary material for: Adaptation Dynamics in Densely Clustered Chemoreceptors
Source: PubMed Central journal article supplement (PMC3777915; doi:10.1371/journal.pcbi.1003230), 2013-09-19
Supplement: pcbi.1003230.s009.pdf [file pcbi.1003230.s009.pdf]

|                                                                     |               |                                   |
|---------------------------------------------------------------------|---------------|-----------------------------------|
| Bulk CheR binding to tether                                         | $a_r^t$       | $1/14.7 \text{ s}^{-1}/T_{Tot,0}$ |
| Bulk CheR binding to modification site                              | $a_r^m$       | $0.0245 \text{ s}^{-1}/T_{Tot,0}$ |
| Tethered CheR binding modification site, same receptor              | $a_{r*}^m$    | $400 \text{ s}^{-1}$              |
| CheR binding tether while attached to mod. site, same receptor      | $a_{r*}^t$    | $1110 \text{ s}^{-1}$             |
| Tethered CheR binding modification site, neighboring receptor       | $a_{r*}^{m'}$ | $400 \text{ s}^{-1}$              |
| CheR binding tether while attached to mod. site, neighboring rec.   | $a_{r*}^{t'}$ | $1110 \text{ s}^{-1}$             |
| CheR unbinding modification site                                    | $d_r^m$       | $9.3 \text{ s}^{-1}$              |
| CheR unbinding tether site                                          | $d_r^t$       | $5 \text{ s}^{-1}$                |
| CheR catalytic rate                                                 | $k_r$         | $2.7 \text{ s}^{-1}$              |
| Bulk CheB-P binding to tether                                       | $a_b^t$       | $1/16.3 \text{ s}^{-1}/T_{Tot,0}$ |
| Bulk CheB-P binding to modification site                            | $a_b^m$       | $0.0245 \text{ s}^{-1}/T_{Tot,0}$ |
| Tethered CheB-P binding modification site, same receptor            | $a_{b*}^m$    | $400 \text{ s}^{-1}$              |
| CheB-P binding tether while attached to mod. site                   | $a_{b*}^t$    | $1000 \text{ s}^{-1}$             |
| Tethered CheB-P binding modification site, neighboring receptor     | $a_{b*}^{m'}$ | $400 \text{ s}^{-1}$              |
| CheB-P binding tether while attached to mod. site, neighboring rec. | $a_{b*}^{t'}$ | $1000 \text{ s}^{-1}$             |
| CheB-P unbinding modification site                                  | $d_b^m$       | $9 \text{ s}^{-1}$                |
| CheB-P unbinding tether site                                        | $d_b^t$       | $5 \text{ s}^{-1}$                |
| CheB-P catalytic rate                                               | $k_b$         | $3 \text{ s}^{-1}$                |
| CheB phosphorylation rate                                           | $a_p$         | $3 \text{ s}^{-1}/T_{Tot}$        |
| CheB-P dephosphorylation rate                                       | $d_p$         | $0.37 \text{ s}^{-1}$             |
