# Supplementary material for: Adaptation Dynamics in Densely Clustered Chemoreceptors
Source: PubMed Central journal article supplement (PMC3777915; doi:10.1371/journal.pcbi.1003230), 2013-09-19
Supplement: pcbi.1003230.s010.pdf [file pcbi.1003230.s010.pdf]

|                                   |       |                                            |
|-----------------------------------|-------|--------------------------------------------|
| CheR catalytic rate               | $k_r$ | $2N (0.03 T_{Tot}/R_{Tot}) \text{ s}^{-1}$ |
| CheB catalytic rate               | $k_b$ |                                            |
| CheR unbinding modification site  | $d_r$ |                                            |
| CheB unbinding modification site  | $d_b$ |                                            |
| CheR binding to modification site | $a_r$ | $(k_r + d_r)/(0.43 T_{Tot})$               |
| CheB binding to modification site | $a_b$ | $(k_b + d_b)/(0.3 T_{Tot})$                |
