# Supplementary material for: Adaptation Dynamics in Densely Clustered Chemoreceptors
Source: PubMed Central journal article supplement (PMC3777915; doi:10.1371/journal.pcbi.1003230), 2013-09-19
Supplement: pcbi.1003230.s011.pdf [file pcbi.1003230.s011.pdf]

|                                          |         |                                   |
|------------------------------------------|---------|-----------------------------------|
| Bulk CheR binding to tether              | $a_r^t$ | $1/14.7 \text{ s}^{-1}/T_{Tot,0}$ |
| CheR unbinding tether                    | $d_r^t$ | $5 \text{ s}^{-1}$                |
| Bulk CheB binding to tether              | $a_b^t$ | $1/16.3 \text{ s}^{-1}/T_{Tot,0}$ |
| CheB unbinding tether                    | $d_b^t$ | $5 \text{ s}^{-1}$                |
| CheR catalytic rate                      | $k_r$   | $2.7 \text{ s}^{-1}$              |
| CheB catalytic rate                      | $k_b$   | $3 \text{ s}^{-1}$                |
| Tethered CheR modification site affinity | $K_r$   | 0.03                              |
| Tethered CheB modification site affinity | $K_b$   | 0.03                              |
| CheB phosphorylation rate                | $a_p$   | $3 \text{ s}^{-1}/T_{Tot}$        |
| CheB-P dephosphorylation rate            | $d_p$   | $0.37 \text{ s}^{-1}$             |
