# Supplementary material for: Adaptation Dynamics in Densely Clustered Chemoreceptors
Source: PubMed Central journal article supplement (PMC3777915; doi:10.1371/journal.pcbi.1003230), 2013-09-19
Supplement: pcbi.1003230.s012.pdf [file pcbi.1003230.s012.pdf]

|                                          |       |                                            |
|------------------------------------------|-------|--------------------------------------------|
| CheR catalytic rate                      | $k_r$ | $2N (0.03 T_{Tot}/R_{Tot}) \text{ s}^{-1}$ |
| CheB catalytic rate                      | $k_b$ | $2N (0.03 T_{Tot}/B_{Tot}) \text{ s}^{-1}$ |
| Tethered CheR modification site affinity | $K_r$ | $0.43 T_{Tot}$                             |
| Tethered CheB modification site affinity | $K_b$ | $0.3 T_{Tot}$                              |
