# Supplementary material for: Adaptation Dynamics in Densely Clustered Chemoreceptors
Source: PubMed Central journal article supplement (PMC3777915; doi:10.1371/journal.pcbi.1003230), 2013-09-19
Supplement: pcbi.1003230.s013.pdf [file pcbi.1003230.s013.pdf]

| Model                  | Base model             | Parameters changed from base model                              |
|------------------------|------------------------|-----------------------------------------------------------------|
| <b>M2</b>              | <b>M1</b>              | $a_{r^*}^{m'} = a_{r^*}^{t'} = a_{b^*}^{m'} = a_{b^*}^{t'} = 0$ |
| <b>M3</b>              | <b>M1</b>              | $d_r^t = d_b^t = 0.25 \text{ s}^{-1}$                           |
| <b>B2</b>              | <b>B1</b>              | $a_r, a_b$ increased tenfold                                    |
| <b>B2 (analytical)</b> | <b>B1 (analytical)</b> | $K_r, K_b$ increased tenfold                                    |
