# Supplementary material for: Adaptation Dynamics in Densely Clustered Chemoreceptors
Source: PubMed Central journal article supplement (PMC3777915; doi:10.1371/journal.pcbi.1003230), 2013-09-19
Supplement: pcbi.1003230.s014.pdf [file pcbi.1003230.s014.pdf]

| Model                           | <b>M1</b> | <b>M2</b> | <b>M3</b> |
|---------------------------------|-----------|-----------|-----------|
| CheR sampling rate (dimers/s)   | 4.1       | 1.1       | 0.64      |
| CheB-P sampling rate (dimers/s) | 3.4       | 0.26      | 0.36      |
